1 **The worldwide allometric relationship in anatomical structures for plant roots**

2 Yue Zhang, Jing-Jing Cao, Qing-Pei Yang, Ming-Zuo Wu, Yong Zhao,

3 De-Liang Kong\*

4

5 College of forestry, Henan Agricultural University, Zhengzhou 450002, China

6

7 \*Corresponding author:

8 Email: [deliangkong1999@126.com](mailto:deliangkong1999@126.com); [deliangkong@henau.edu.cn](mailto:deliangkong@henau.edu.cn);

9 Tel: 0371-63558070

10

11 Email for coauthors:

12 Yue Zhang: [zhangyue5724@163.com](mailto:zhangyue5724@163.com)

13 JingJing Cao: [caojingjingcj@126.com](mailto:caojingjingcj@126.com)

14 QingPei Yang: [yangqingpei1992@126.com](mailto:yangqingpei1992@126.com)

15 MingZuo Wu: [wumingzuo@henau.edu.cn](mailto:wumingzuo@henau.edu.cn)

16 Yong Zhao: [zhaoyonghnnd@163.com](mailto:zhaoyonghnnd@163.com)

17

18 **Abstract**

19 The anatomical structures, i.e., the cortex and stele, are fundamental for the absorptive  
20 function of plant roots. Unraveling how the allometric structures are assembled in  
21 absorptive roots is essential for our understanding the plant ecology, physiology and  
22 responses to global environmental changes. In this review study, we first compile a  
23 globally largest dataset on key root structural traits, i.e., root diameter, cortex  
24 thickness and stele radius across 512 species. Using this largest dataset, we confirm  
25 an allometric relationship of absorptive root structures in a previous study using a  
26 much smaller species pool, i.e., the cortex thickness increased much faster than the  
27 stele radius with increasing root diameter. The allometric relationship is further  
28 validated within and across different plant growth forms (woody, grass, and liana  
29 species), mycorrhiza types (arbuscular mycorrhiza, ectomycorrhiza, and orchid  
30 mycorrhizas), phylogenetic gradients (from ferns to Orchidaceae of primitive  
31 angiosperms), and environmental change scenarios (e.g., the elevation of atmospheric  
32 CO<sub>2</sub> concentration and nitrogen fertilization), supporting the universal allometric  
33 relationship in plant roots. We then summarized recent proceedings as well as possible  
34 issues on mechanisms underlying the root allometric relationship. The ecological and  
35 evolutionary implications for this allometric relationship in roots are also discussed.  
36 Finally, we propose several directions that should be stressed in future studies  
37 regarding the allometric relationship in plant roots.

38

39 **Key words:** allometric relationship, root diameter, cortex thickness, stele radius

## 40 **1. Introduction**

41 Plant roots play a crucial role in plant growth, vegetation dynamics, ecosystem  
42 functioning like productivity formation, nutrient cycle and their responses to  
43 environmental changes (Carmona et al., 2021; Laughlin et al., 2021; Chandregowda et  
44 al., 2022; Encinas-Valero et al., 2022; Hong et al., 2022). Compared to studies on plant  
45 above-ground organs such as leaves and stems that have undergone enormous  
46 proceedings (Wright et al., 2004; Diaz et al., 2016; Joswig et al., 2022), our  
47 understanding of plant roots remains in its infancy. The core function of plant roots is  
48 to absorb soil water and nutrients, which is undertaken by a few terminal root branch  
49 orders, i.e., absorptive roots, mainly bearing primary root tissues (Guo et al., 2008b).  
50 Generally, the absorptive function is depicted by a range of traits in root morphology,  
51 physiology, anatomy, chemistry, mechanics and microbial symbiosis (McCormack et  
52 al., 2017; Wambsganss et al., 2021; Wen et al., 2022; Yan et al., 2022). Among these  
53 root traits, root diameter seems like the most important one given that it is closely  
54 associated with a suite of other root traits as well as mycorrhizal fungi apart from its  
55 well-known feature of easily measured and great inter-specific variation (Eissenstat et  
56 al., 2015; Li et al., 2018; Bergmann et al., 2020; Wen et al., 2022). Furthermore, root  
57 diameter is the phylogenetically most conservative root trait, suggesting that the great  
58 inter-specific variation could largely be an evolutionarily imprint from the geological  
59 environmental change such as atmospheric CO<sub>2</sub> decline since the Cretaceous (Comas  
60 et al., 2012; Chen et al., 2013; Pineiro et al., 2020; Lugli et al., 2021).

61 The absorption function of plant roots is essentially determined by root anatomical

62 structures. Generally, absorptive roots are composed of two cylindrical components,  
63 i.e., cortex and stele. The cortex directly takes part in the absorption of water and  
64 nutrients and indirectly acquire these resources by associations with mycorrhizal fungi  
65 (Brundrett, 2002; Ma et al., 2018; Rich et al., 2021). The stele is responsible for  
66 transporting water and nutrients upward to stems and leaves, and the stele supply energy  
67 demanding of the roots with leaf photosynthate. Theoretically, the change in root  
68 diameter is mainly derived from the size variations of the cortex and stele, while how  
69 the cortex and stele are coordinated with the shifts of root diameter has not been  
70 uncovered until 2014 when two research groups independently found an allometric  
71 relationship between the cortex and stele (Gu et al., 2014; Kong et al., 2014), i.e., the  
72 cortex thickness increased linearly and much faster than the stele radius with increasing  
73 root diameter. Later, this allometric relationship was reported in many studies, and was  
74 synthesized by Kong et al. (2019) who reported a global existence of the allometric  
75 relationship in root cortex and stele across 204 plant species.

76       Uncovering of the allometry relationship paves a new way for our understanding  
77 of the form-function relationship in roots and plant evolution and adaptation to  
78 environmental changes (McCormack et al., 2017; Kong et al., 2019; Bergmann et al.,  
79 2020; Zhou et al., 2022). Since the global recognition of the allometric relationship  
80 between root cortex and stele in 2019, mounting studies have focused on root  
81 anatomical traits for one hand, and for the other hand we also note that some early  
82 studies on Orchidaceae and vine root anatomy were neglected in Kong et al. (2019).  
83 Further, despite the worldwide mycorrhizal associations in terrestrial plants, we know

84 little about whether and how the allometric relationship in absorptive roots varies  
85 among mycorrhizal types with contrasting mycorrhizal structures and functioning  
86 (e.g., arbuscular mycorrhiza (AM) vs. ectomycorrhiza (EM)) (Brundrett, 2002; Martin  
87 et al., 2017) Additionally, no studies to date have explored how the environmental  
88 changes affect the above allometric relationship in roots. Therefore, it is necessary to  
89 further test the generality of the root allometric relationship using a much larger  
90 species pool than that in Kong et al. (2019).

91 To fulfill this purpose, in this review paper, we made a thorough screening of the  
92 data on the cortex thickness and the stele radius of absorptive roots in Web of Science,  
93 Google Scholar, FRED 3.0 and CNKI (China's national knowledge infrastructure)  
94 using keywords included “cortex”, “stele”, “anatomic structure”, “allometric  
95 relationship”, “root diameter”. Our searching yielded 3,676,679 papers and reports.  
96 We then refined these results according to additional criteria: (1) the study must be an  
97 empirical rather than a review or perspective; (2) the data on root diameter and stele  
98 radius were accessible. We also included some unpublished data (supplementary data  
99 2) on root anatomical traits which were measured at the same sites and following the  
100 same procedures as our previous study (Kong et al., 2014). Finally, our dataset  
101 included 32 empirical studies (supplementary data 1) with a total of 698 observations  
102 of 512 species at 41 sites (Fig. 1). Specifically, the dataset included 271 woody  
103 species and 241 non-woody species (78 grass, 92 herb, 37 fern and 28 Orchidaceae  
104 species). In addition, 13 liana species were included in the dataset. For the same  
105 species appearing in different studies, we used the average value of the root traits

106 across species as the trait value of this species. For some studies with only the data of  
107 the stele radius and root diameter, we use the difference between the root diameter  
108 and stele radius (equal to the thickness of tissues outside the stele including the  
109 epidermis, exodermis and cortex, i.e., tToS, as a proxy approximate to the cortex  
110 thickness (Kong et al., 2019). For the studies with root trait data displayed in figures  
111 or only photos on root anatomical structures presented, we digitalized the root trait  
112 data using the software “SigmaScan Pro software (V5.0, SPSS Inc., Chicago, USA)”  
113 and the software “IMAGE J (NIH Image, Bethesda, MD, USA)”, respectively.

114 Overall, in this review we aim to: (1) test the generality of the allometric  
115 relationship between root cortex and stele within and across different plant growth  
116 forms, mycorrhizal types and environmental treatments; (2) summarize mechanisms  
117 and implications for such allometric relationship; (3) propose important directions for  
118 future studies regarding the root allometric relationship.

## 119 **2. Generality of the allometric relationship in absorptive roots**

120 The allometric relationship between the cortex and the stele still held across the 698  
121 observations and 512 species of root anatomical structures (Table 1; Fig. 2a, 2b). For  
122 the 26 studies with root anatomical structures examined in at least three species, the  
123 allometric relationship in absorptive roots existed in most of the studies, while only  
124 four studies seemed exceptional (Table 2; Fig. 3; Supplementary data 1).

125 The allometric relationship in absorptive roots also occurred in different plant  
126 growth forms. For example, the thickness of tToS in woody species increases 7.6-fold  
127 faster than the stele radius with increasing root diameter, and the slope difference

128 (3.3-fold) is much lower in non-woody species (Table 1; Fig. 4), This allometric  
129 relationship is very similar to that reported by Kong et al. (2019) using less than half  
130 of the species number as in our study Within the non-woody species, the allometric  
131 relationship was found in each of the fern grass, herb, and Orchidaceae (Fig. 5).  
132 Interestingly, we observed a 5.1-fold difference of the slope in the root allometric  
133 relationship in Orchidaceae species while the slope difference is much lower in other  
134 three non-woody groups (Table 1). Finally, for the vine species, both the woody and  
135 non-woody ones, followed the allometric manner in building their absorptive roots  
136 (Supplementary Table 1; Supplementary Fig. 2a, 2b, 2c).

137       Among the dominant mycorrhizal types, the allometric relationship between root  
138 cortex and stele was observed in AM (Fig. 6a), regardless of being woody or non-  
139 woody of the plants (Fig. 7a, 7b), and the dual mycorrhizas of AM & EM plants but  
140 not in EM plants (Table 1; Fig. 6b, 6c). While we do note a significant allometric  
141 relationship in broadleaf EM trees but not in coniferous EM trees (Table 2; Fig. 8).  
142 Therefore, it is likely that the inclusion of such coniferous EM trees could lead to the  
143 overall no root allometric relationship across the EM plants. Considering only six  
144 coniferous EM plant species included in our dataset, we can not rule out the  
145 possibility of the root allometric relationship in other coniferous EM trees.  
146 Nevertheless, the contrasting root allometric relationships between broadleaf and  
147 coniferous EM trees may reflect the interior difference of the two types of EM plants  
148 in root structures and functioning (Guo et al., 2008b; Chen et al., 2016). the  
149 coniferous EM trees usually have vascular conduits (tracheid and sieve cells) with

150 much lower matter (water and photosynthates) transport efficiency relative to the  
151 more efficient conduits (vessels and sieve tubes) in broadleaf EM plants (Guo et al.,  
152 2008b). It is likely that with the shift of root diameter across coniferous EM trees,  
153 some unknown strategies could be adopted rather than only change the size of the  
154 stele to increase matter transport efficiency; this, as such, results in no root allometric  
155 relationship in the coniferous EM plants. Finally, we show for the first time that the  
156 root allometric relationship still exists in another important mycorrhizal type, i.e., the  
157 Orchid mycorrhiza (OM) plants (Table 2; Fig. 5d), usually bearing much thicker  
158 absorptive roots (up to 4.6mm) (Zhu et al., 2016) than most of the AM and EM plants.

159       Root anatomical structures have also been measured sparsely under different  
160 environmental change scenarios (e.g., soil nitrogen or phosphorus fertilization,  
161 increase of atmospheric CO<sub>2</sub> concentration and seasonality in rainfall) (Table 1; Fig.  
162 9), which provides an opportunity to test the consistency of the root allometric  
163 relationship. Although the root allometric relationship in some scenarios does not hold  
164 statistically (Fig. 9), this is apparently due to the inclusion of a few species with  
165 “exceptionally” large or small size of root cortex and stele or the inclusion of some  
166 species with “exceptional” responses to the environmental changes (e. g., Fig. 9a<sub>2</sub>, a<sub>3</sub>,  
167 b<sub>2</sub>, b<sub>3</sub>, d<sub>2</sub>, d<sub>3</sub>). Overall, our results suggested a relative insensitiveness of the root  
168 allometric relationship to the environmental changes. Interestingly, we note that the  
169 cortex thickness increases slower and the stele radius increases faster with increasing  
170 root diameter in the rainy season compared with that in the dry season, consequently  
171 causing an equal rather than allometric increase rate of the cortex thickness and stele



172 radius in the rainy season (Fig. 9d<sub>2</sub>, d<sub>3</sub>). It is worthwhile to test the generality of such  
173 impact on the root allometric relationship by rainfall seasonality and uncover the  
174 underlying mechanisms in future studies.

175 Together, the wide existence of the allometric relationship between root cortex  
176 and stele across different climatic zones (tropical, sub-tropical and temperate),  
177 ecosystem types (forests, grasslands, deserts and mangroves), mycorrhizal types (AM,  
178 some EM, AM&EM, OM), phylogenetic gradients (from ferns to Orchidaceae), and  
179 environmental change scenarios support the universal rule of the allometric  
180 relationship by which the root anatomical structures are assembled.

### 181 **3. Mechanisms of the root allometric relationship**

182 Currently, two theories have been proposed in explaining why the allometric  
183 relationship between the cortex and stele is formed. One is the nutrient absorption-  
184 transportation balance theory (Kong et al., 2017) and the other is the carbon supply-  
185 consumption balance theory (Kong et al., 2021; Colombi et al., 2022) (Fig. 10). Both  
186 theories run according to the principle of functional balance of the matter (nutrients,  
187 photosynthates) transport within root tissues as well as the physical law of fluid  
188 transport in the conduits, namely the “Hagen-Poiseuille law” (Jensen et al., 2016). Here,  
189 we only outline the two theories and readers can refer to the original papers for details  
190 of the theories.

191 There are two parallel vascular systems in root steles, i.e., vessels responsible for  
192 transporting water and nutrients upward to stems and leaves and sieves responsible for  
193 meeting the carbon demanding of the root. According to the Hagen-Poiseuille law, both

194 volumetric flow rates in the conduits (i.e., water and nutrient transportation via vessels  
195 and photosynthate transportation via sieves) scale to the fourth power of the root radius;  
196 while even the maximum nutrient absorption (via mycorrhizal fungi in the cortex) and  
197 carbon consumption (via the cortex) scale less than the twice power of root radius. In  
198 this case, only a much faster increase of the cortex thickness than the stele radius with  
199 increasing root diameter (i.e., the allometric relationship) can lead to a *balance between*  
200 *the nutrient absorption* (via mycorrhizal fungi in the cortex) *and the nutrient*  
201 *transportation* (via vessels in the stele) *and a balance between the carbon supply* (via  
202 sieves in the stele) *and carbon consumption* (via the cortex).

203       Nevertheless, we should also keep in mind of some important limitations of the  
204 above two theories. Firstly, the *nutrient absorption-transportation balance* theory holds  
205 on a prerequisite of a universal association of plant roots with mycorrhizal fungi, while  
206 there are still a lot of species with no mycorrhizal associations (Vander et al., 2015;  
207 Brundrett and Tedersoo, 2018; Correia et al., 2018). Secondly, the two theories seem  
208 running independently although they are based on two interconnected vascular  
209 conducts, i.e., vessels and sieves. It is also interesting to learn about how the above two  
210 theories are linked with leaves, the important sink of nutrients and the source of carbon.  
211 Thirdly, empirical evidence is urgently needed to test the prediction of the above  
212 functional balance that underlies the root allometric relationship.

213

#### 214 **4. Implication of the root allometric relationship**

##### 215 **4.1 Relationship with the "root economics spectrum"**

216 Traditionally, root economic spectrum is considered to be the core trait dimension in  
217 roots which conveys a trade-off between nutrient uptake and conservation (Freschet et  
218 al., 2010; Reich, 2014; Kramer-Walter et al., 2016). It has been widely recognized that  
219 a positive correlation between root diameter and root life span (i.e., conservation of  
220 nutrient) (Guo et al., 2008a; Gu et al., 2017; Liese et al., 2019) and a negative  
221 correlation between root nutrient uptake and root tissue density (RTD) (Zadworny et  
222 al., 2017; Stock et al., 2021). If the trade-off exists between root nutrient uptake and  
223 conservation, there should be a positive correlation between RTD and root diameter.  
224 However, besides such a prediction, many studies also found a negative or no  
225 relationship between RTD and root diameter (Weemstra et al., 2016; Kong et al.,  
226 2019; Han and Zhu, 2021). Based on the universal allometric relationship between  
227 root cortex and stele, we predict a negative and non-linear relationship between RTD  
228 and root diameter, and this prediction has been verified using a global root trait  
229 dataset (Kong et al., 2019). Therefore, the formation of the root allometric  
230 relationship may not support the existence of the widely acknowledged root economic  
231 spectrum.

232

## 233 **4.2 Plant evolution and adaptation to environment**

234 The evolution of angiosperms is closely related to the decline of atmospheric CO<sub>2</sub>  
235 concentration since the mid-Cretaceous (Beerling and Berner, 2005; Gerhart and  
236 Ward, 2010). For example, the reduction of atmospheric CO<sub>2</sub> concentration often  
237 lowers leaf photosynthesis, consequently causing “carbon starvation” to plants. To

238 survive in this carbon limitation condition, plants tend to increase stomatal  
239 conductance to compensatively improve leaf CO<sub>2</sub> fixation (Zhou et al., 2013; Holttä et  
240 al., 2017). However, large stomatal conductance will enhance the transpiration water  
241 loss, as such causing physiological drought to plants (Khan et al., 2007; Wang et al.,  
242 2018). The surge of leaf vein density in angiosperms since the mid-Cretaceous, hence  
243 resulting more efficient water supply to the mesophyll cell for photosynthesis, can be  
244 considered as evidence for plant adaptation to the physiological drought (Baraloto et  
245 al., 2010; Feild et al., 2011; Baird et al., 2021; Yan et al., 2022).

246 Coordinated with the evolutionary change in leaves, thinning of the absorptive  
247 roots is regarded as an adaptation to the physiological drought caused by the decline  
248 of atmospheric CO<sub>2</sub> concentration (Fig. 11a) (Comas et al., 2012; Chen et al., 2013;  
249 Ma et al., 2018). Alongside the thinning of the absorptive roots, the much faster  
250 decrease of the cortex thickness than the stele radius means effectively reducing the  
251 resistance of water and nutrients entering the root tissues for one hand and for the  
252 other hand effectively reducing the carbon consumption by root cortex (Fig. 11b).  
253 Therefore, the allometrically structured roots are much beneficial for plants to survive  
254 under the carbon and water limited environment. From this point of view, the  
255 allometric relationship in absorptive roots is insightful for our understanding of how  
256 the roots, whole plants and even the ecosystems respond and adapt to the geological  
257 and the on-going environmental changes.

258

259 **5. Future directions**

## 260 **5.1 Differences of the root allometric relationship among studies**

261 Studies to date always concentrate on the general pattern of the root allometric  
262 relationship, i.e., a much larger slope of the cortex thickness *vs.* root diameter  
263 regression than the slope of the stele radius *vs.* root diameter regression, while ignore  
264 the great difference of the above allometry, that is, the slope difference ranging from  
265 the minimum 1.2-fold to the maximum 15.7-fold across studies (Table 2). We are still  
266 unclear about mechanisms accounting for such huge difference in the root allometric  
267 relationship. This is a fascinating question that could stimulate far-reaching outcomes  
268 in this field.

## 269 **5.2 Examining root anatomical structures in more species**

270 The global establishment of the allometric relationship between root cortex and stele  
271 relies on about 500 plant species, much smaller than the total vascular plant species  
272 number (about 390,000) on the earth (Cantwell-Jones et al., 2022). Even in the global  
273 root trait dataset, such as FRED 3.0 (Iversen et al., 2021), the measurements of root  
274 anatomical traits are far less than the measurements of other root traits such as root  
275 diameter and root tissue density. Therefore, it is necessary to measure root anatomical  
276 structures in more plant species, especially the families with a large number of species  
277 like Orchidaceae with over 20, 000 species.

## 278 **5.3 Effects of environmental changes on the root allometric relationship**

279 By far, only four studies are available for our evaluation on how environmental changes  
280 alter the allometric relationship in absorptive roots. Moreover, only a few  
281 environmental change scenarios are considered and no interactions among these factors

282 have been examined in these studies. Apart from the studies under controlled  
283 environments, we need to pay more attention to plants growing in naturally stressful  
284 conditions such as alpine forests, deserts, and coast environments in high salinity.  
285 Comparison of the root allometric relationship under the controlled and the natural  
286 conditions could be instructive for our understanding and prediction of vegetation  
287 dynamics under global climate change.

288

#### 289 **5.4 Linking the root allometric relationship with plant above-ground organs**

290 Plant growth and evolution depends on the functional coordination between plant  
291 above- and below-ground organs (Aritsara et al., 2022; Weigelt et al., 2021; Zhou et  
292 al., 2022). In the framework of the root allometric relationship, the faster increase of  
293 the cortex thickness than stele radius could be accompanied with a faster supply of  
294 leaf photosynthate to the roots. We know little about how plants with thick absorptive  
295 roots assign their leaf traits to meet functional balance of water, nutrients and carbon  
296 between roots and leaves. Another interesting question is how the root allometric  
297 relationship can be coordinated with plant reproductive organs like flowers, fruits and  
298 seeds given that the reproductive organs usually compete with roots for  
299 photosynthates and with leaves for water and nutrients. Therefore, linking the root  
300 allometric relationship with plant above-ground organs could pave a new way for our  
301 understanding of the co-evolution within plants and between plants and animals for  
302 pollination or seed dispersal.

303 .

304

## 305 **Author Contributions**

306 Y.Z. and D.K. conceived the ideas of this review paper, D.K. and Y.Z. performed the  
307 data analysis, Y.Z. wrote the first draft of this manuscript and Y.Z., D.K., J.C., Q.Y.,  
308 M.W., and Y.Z. all contributed to the editing and revision of the final version of the  
309 manuscript.

310

## 311 **Acknowledgements**

312 We are grateful for Oscar J. Valverde-Barrantes and WenHua Xiang for their  
313 assistance in data collection work. This study was funded by the National Natural  
314 Science Foundation of China (32171746, 42077450, 31870522 and 31670550), and  
315 the Scientific Research Foundation of Henan Agricultural University (30500854),  
316 Research Funds for overseas returnee in Henan Province, China.

317

## 318 **References**

- 319 Aritsara, A.N.A., Wang, S., Li, B.N., et al., 2022. Divergent leaf and fine root "pressure-volume  
320 relationships" across habitats with varying water availability. *Plant Physiol.* 2-14.
- 321 Baird, A.S., Taylor, S.H., Pasquet-Kok, J., et al., 2021. Developmental and biophysical determinants of  
322 grass leaf size worldwide. *Nature.* 592, 242-+.
- 323 Baraloto, C., Paine, C.E.T., Poorter, L., et al., 2010. Decoupled leaf and stem economics in rain forest  
324 trees. *Ecol Lett.* 13, 1338-1347.
- 325 Beerling, D.J., Berner, R.A., 2005. Feedbacks and the coevolution of plants and atmospheric CO<sub>2</sub>. *Proc*  
326 *Natl Sci. U. S.A.* 102, 1302-1305.
- 327 Beerling, D.J., Franks, P.J., 2010. The hidden cost of transpiration. *Nature.* 464, 495-496.
- 328 Bergmann, J., Weigelt, A., van Der Plas, F., et al., 2020. The fungal collaboration gradient dominates the  
329 root economics space in plants. *Sci Adv.* 6, 1193-1208.
- 330 Brundrett, M.C., 2002. Coevolution of roots and mycorrhizas of land plants. *New Phytol.* 154, 275-304.
- 331 Brundrett, M.C., Tedersoo, L., 2018. Evolutionary history of mycorrhizal symbioses and global host  
332 plant diversity. *New Phytol.* 220, 1108-1115.
- 333 Cantwell-Jones, A., Ball, J., Collar, D., et al., 2022. Global plant diversity as a reservoir of micronutrients  
334 for humanity. *Nat Plants.* 8, 225-+.
- 335 Carmona, C.P., Bueno, C.G., Toussaint, A., et al., 2021. Fine-root traits in the global spectrum of plant  
336 form and function. *Nature.* 597, 683-687.

- 337 Chandregowda, M.H., Tjoelker, M.G., Pendall, E., et al., 2022. Root trait shifts towards an avoidance  
338 strategy promote productivity and recovery in C-3 and C-4 pasture grasses under drought. *Funct*  
339 *Ecol.* 36, 1754-1771.
- 340 Chen, W.L., Koide, R.T., Adams, T.S., et al., 2016. Root morphology and mycorrhizal symbioses together  
341 shape nutrient foraging strategies of temperate trees. *Proc Natl Sci. U. S.A.* 113, 8741-8746.
- 342 Chen, W.L., Zeng, H., Eissenstat, D.M., et al., 2013. Variation of first-order root traits across climatic  
343 gradients and evolutionary trends in geological time. *Glob Ecol Biogeogr.* 22, 846-856.
- 344 Iversen C.M., McCormack M.L., Baer J.K., et al., 2021. Fine-Root Ecology Database (FRED): A Global  
345 Collection of Root Trait Data with Coincident Site, Vegetation, Edaphic, and Climatic Data,  
346 Version 3.
- 347 Colombi, T., Chakrawal, A., Herrmann, A.M., 2022. Carbon supply-consumption balance in plant roots:  
348 effects of carbon use efficiency and root anatomical plasticity. *New Phytol.* 233, 1542-1547.
- 349 Comas, L.H., Mueller, K.E., Taylor, L.L., et al., 2012. Evolutionary patterns and biogeochemical  
350 significance of angiosperm root traits. *Int J Plant Sci.* 173, 584-595.
- 351 Correia, M., Heleno, R., Vargas, P., et al., 2018. Should I stay or should I go? Mycorrhizal plants are  
352 more likely to invest in long-distance seed dispersal than non-mycorrhizal plants. *Ecol Lett.* 21,  
353 683-691.
- 354 Diaz, S., Kattge, J., Cornelissen, J.H.C., et al., 2016. The global spectrum of plant form and function.  
355 *Nature.* 529, 167-+.
- 356 Eissenstat, D.M., Kucharski, J.M., Zadworny, M., et al., 2015. Linking root traits to nutrient foraging in  
357 arbuscular mycorrhizal trees in a temperate forest. *New Phytol.* 208, 114-124.
- 358 Encinas-Valero, M., Esteban, R., Hereş, A.M., et al., 2022. Holm oak decline is determined by shifts in  
359 fine root phenotypic plasticity in response to belowground stress. *New Phytol.* 235, 2237-2251.
- 360 Feild, T.S., Brodrigg, T.J., Iglesias, A., et al., 2011. Fossil evidence for Cretaceous escalation in  
361 angiosperm leaf vein evolution. *Proc Natl Sci. U. S.A.* 108, 8363-8366.
- 362 Freschet, G.T., Cornelissen, J.H.C., Van Logtestijn, R.S.P., et al., 2010. Evidence of the 'plant economics  
363 spectrum' in a subarctic flora. *J Ecol.* 98, 362-373.
- 364 Gerhart, L.M., Ward, J.K., 2010. Plant responses to low CO<sub>2</sub> of the past. *New Phytol.* 188, 674-695.
- 365 Gu, J.C., Wang, Y., Fahey, T.J., et al., 2017. Effects of root diameter, branch order, soil depth and season  
366 of birth on fine root life span in five temperate tree species. *Eur J Forest Res.* 136, 727-738.
- 367 Gu, J.C., Xu, Y., Dong, X.Y., et al., 2014. Root diameter variations explained by anatomy and phylogeny  
368 of 50 tropical and temperate tree species. *Tree Physiol.* 34, 415-425.
- 369 Guo, D.L., Mitchell, R.J., Withington, J.M., et al., 2008a. Endogenous and exogenous controls of root  
370 life span, mortality and nitrogen flux in a longleaf pine forest: root branch order predominates.  
371 *J Ecol.* 96, 737-745.
- 372 Guo, D.L., Xia, M.X., Wei, X., et al., 2008b. Anatomical traits associated with absorption and  
373 mycorrhizal colonization are linked to root branch order in twenty-three Chinese temperate tree  
374 species. *New Phytol.* 180, 673-683.
- 375 Han, M.G., Zhu, B., 2021. Linking root respiration to chemistry and morphology across species. *Glob*  
376 *Change Biol.* 27, 190-201.
- 377 Holtta, T., Lintunen, A., Chan, T., et al., 2017. A steady-state stomatal model of balanced leaf gas  
378 exchange, hydraulics and maximal source-sink flux. *Tree Physiol.* 37, 851-868.
- 379 Hong, Y., Zhou, Q., Hao, Y., et al., 2022. Crafting the plant root metabolome for improved microbe-  
380 assisted stress resilience. *New Phytol.* 234, 1945-1950.



- 381 Jensen, K. H., Berg-Sørensen, K., Bruus, H., et al., 2016. Sap flow and sugar transport in plants. *Rev*  
382 *Mod Phys.* 88, 035007.
- 383 Joswig, J.S., Wirth, C., Schuman, M.C., et al., 2022. Climatic and soil factors explain the two-  
384 dimensional spectrum of global plant trait variation. *Nat Ecol Evol.* 6, 36-+.
- 385 Khan, H.U.R., Link, W., Hocking, T.J., et al., 2007. Evaluation of physiological traits for improving  
386 drought tolerance in faba bean (*Vicia faba* L.). *Plant Soil.* 292, 205-217.
- 387 Kong, DL., Wang, J., Zeng, H., et al., 2014. Leading dimensions in absorptive root trait variation across  
388 96 subtropical forest species. *New Phytol.* 203, 863-872.
- 389 Kong, DL., Wang, J., Wu, H., et al., 2019. Nonlinearity of root trait relationships and the root economics  
390 spectrum. *Nat Commun.* 10, 2203.
- 391 Kong, DL., Wang, J., Zeng, H., et al., 2017. The nutrient absorption–transportation hypothesis:  
392 optimizing structural traits in absorptive roots. *New Phytol.* 213, 1569-1572.
- 393 Kong, DL., Wang, J.J., Valverde-Barrantes, O.J., et al., 2021. A framework to assess the carbon supply-  
394 consumption balance in plant roots. *New Phytol.* 229, 659-664.
- 395 Kramer-Walter, K.R., Bellingham, P.J., Millar, T.R., et al., 2016. Root traits are multidimensional:  
396 specific root length is independent from root tissue density and the plant economic spectrum. *J*  
397 *Ecol.* 104, 1299-1310.
- 398 Laughlin, D.C., Mommer, L., Sabatini, F.M., et al., 2021. Root traits explain plant species distributions  
399 along climatic gradients yet challenge the nature of ecological trade-offs. *Nat Ecol Evol.* 5,  
400 1123-+.
- 401 Li, X., Dong, J.L., Chu, W.Y., et al., 2018. The relationship between root exudation properties and root  
402 morphological traits of cucumber grown under different nitrogen supplies and atmospheric CO<sub>2</sub>  
403 concentrations. *Plant Soil.* 425, 415-432.
- 404 Liese, R., Leuschner, C., Meier, I.C., 2019. The effect of drought and season on root life span in temperate  
405 arbuscular mycorrhizal and ectomycorrhizal tree species. *J Ecol.* 107, 2226-2239.
- 406 Lugli, L.F., Rosa, J.S., Andersen, K.M., et al., 2021. Rapid responses of root traits and productivity to  
407 phosphorus and cation additions in a tropical lowland forest in Amazonia. *New Phytol.* 230,  
408 116-128.
- 409 Ma, ZQ., Guo, DL., Xu, X., et al., 2018. Evolutionary history resolves global organization of root  
410 functional traits. *Nature.* 555, 94-97.
- 411 Martin, F.M., Uroz, S., Barker, D.G., 2017. Ancestral alliances: Plant mutualistic symbioses with fungi  
412 and bacteria. *Science.* 356, eaad4501
- 413 McCormack, M.L., Guo, D.L., Iversen, C.M., et al., 2017. Building a better foundation: improving root-  
414 trait measurements to understand and model plant and ecosystem processes. *New Phytol.* 215,  
415 27-37.
- 416 Pineiro, J., Ochoa-Hueso, R., Drake, J.E., et al., 2020. Water availability drives fine root dynamics in  
417 a *Eucalyptus* woodland under elevated atmospheric CO<sub>2</sub> concentration. *Funct Ecol.* 34, 2389-  
418 2402.
- 419 Reich, P.B., 2014. The world-wide ‘fast–slow’ plant economics spectrum: a traits manifesto. *J Ecol.* 102,  
420 275-301.
- 421 Rich, M.K., Vigneron, N., Libourel, C., et al., 2021. Lipid exchanges drove the evolution of mutualism  
422 during plant terrestrialization. *Science.* 372, 864-+.
- 423 Stock, S.C., Koester, M., Boy, J., et al., 2021. Plant carbon investment in fine roots and arbuscular  
424 mycorrhizal fungi: A cross-biome study on nutrient acquisition strategies. *Sci Total Environ.*

425 781, 146748.  
426 Van der Heijden, M.G.A., Martin, F.M., Selosse, M.A., et al., 2015. Mycorrhizal ecology and evolution:  
427 the past, the present, and the future. *New Phytol.* 205, 1406-1423.  
428 Wambsganss, J., Freschet, G.T., Beyer, F., et al., 2021. Tree species mixing causes a shift in fine-root soil  
429 exploitation strategies across European forests. *Funct Ecol.* 35, 1886-1902.  
430 Wang, X.X., Du, T.T., Huang, J.L., et al., 2018. Leaf hydraulic vulnerability triggers the decline in  
431 stomatal and mesophyll conductance during drought in rice. *J Exp Bot.* 69, 4033-4045.  
432 Weemstra, M., Mommer, L., Visser, E.J., et al., 2016. Towards a multidimensional root trait framework:  
433 a tree root review. *New Phytol.* 211, 1159-1169.  
434 Weigelt, A., Mommer, L., Andraczek, K., et al., 2021. An integrated framework of plant form and  
435 function: the belowground perspective. *New Phytol.* 232, 42-59.  
436 Wen, Z.H., White, P.J., Shen, J.B., et al., 2022. Linking root exudation to belowground economic traits  
437 for resource acquisition. *New Phytol.* 233, 1620-1635.  
438 Wright, I.J., Reich, P.B., Westoby, M., et al., 2004. The worldwide leaf economics spectrum. *Nature.* 428,  
439 821-827.  
440 Yan, H., Freschet, G.T., Wang, H.M., et al., 2022. Mycorrhizal symbiosis pathway and edaphic fertility  
441 frame root economics space among tree species. *New Phytol.* 234, 1639-1653.  
442 Zadworny, M., McCormack, M.L., Zytowskiak, R., et al., 2017. Patterns of structural and defense  
443 investments in fine roots of Scots pine (*Pinus sylvestris* L.) across a strong temperature and  
444 latitudinal gradient in Europe. *Glob Change Biol.* 23, 1218-1231.  
445 Zhou, M., Guo, Y.M., Sheng, J., et al., 2022. Using anatomical traits to understand root functions across  
446 root orders of herbaceous species in a temperate steppe. *New Phytol.* 234, 422-434.  
447 Zhou, Y.M., Jiang, X.J., Schaub, M., et al., Ten-year exposure to elevated CO<sub>2</sub> increases stomatal number  
448 of *Pinus koraiensis* and *P. sylvestrifomis* needles. *Eur J Forest Res.* 132, 899-908.  
449 Zhu L.Q., Xu Y.X., Zhao L.J., et al., 2016. anatomical structure and environmental adaptability of  
450 *Cymbidium cyperifolium* in karst area. *Guihaia.* 36, 1179-1185+1164.  
451

452

453

454

455

456

**Table 1.** The relationships between root diameter (RD) and the cortex thickness (CT) and the stele radius (SR) for different plant forms and different environmental treatments. *Slope* <sub>(RD-CT)</sub>: the slope for the regression of the cortex thickness with root diameter; *Slope* <sub>(RD-SR)</sub> the slope for the regression of the stele radius with root diameter; *Slope* <sub>(RD-CT)</sub> / *Slope* <sub>(RD-SR)</sub>: ratio of the *Slope* <sub>(RD-CT)</sub> to the *Slope* <sub>(RD-SR)</sub>; Slope comparison: the statistical test of the difference between the above two slopes using standardized major axis method.

| Species class       |                                   | The number of species | <i>Slope</i> <sub>(RD-CT)</sub> | <i>Slope</i> <sub>(RD-SR)</sub> | <i>Slope</i> <sub>(RD-CT)</sub> / <i>Slope</i> <sub>(RD-SR)</sub> | Slope comparison |
|---------------------|-----------------------------------|-----------------------|---------------------------------|---------------------------------|-------------------------------------------------------------------|------------------|
|                     | Measurement                       | 698                   | 0.44***                         | 0.15***                         | 2.93                                                              | ***              |
| Species level       | All species                       | 512                   | 0.40***                         | 0.12***                         | 3.33                                                              | ***              |
|                     | Woody                             | 271                   | 0.53***                         | 0.07***                         | 7.57                                                              | ***              |
|                     | Non-woody                         |                       |                                 |                                 |                                                                   |                  |
|                     | Fern + grass + herb +Orchidaceae  | 241                   | 0.39***                         | 0.12***                         | 3.25                                                              | ***              |
|                     | Fern                              | 37                    | 0.31***                         | 0.17***                         | 1.82                                                              | ***              |
|                     | Grass                             | 78                    | 0.39***                         | 0.19***                         | 2.05                                                              | ***              |
|                     | Herb                              | 92                    | 0.38***                         | 0.11***                         | 3.45                                                              | ***              |
|                     | Orchidaceae                       | 28                    | 0.41***                         | 0.08***                         | 5.12                                                              | ***              |
| Mycorrhiza type     | AM                                |                       |                                 |                                 |                                                                   |                  |
|                     | Woody + non-woody                 | 217                   | 0.53***                         | 0.07***                         | 7.57                                                              | ***              |
|                     | Woody                             | 197                   | 0.53***                         | 0.07***                         | 7.57                                                              | ***              |
|                     | Non-woody                         | 212                   | 0.35***                         | 0.18***                         | 1.94                                                              | ***              |
|                     | EM                                |                       |                                 |                                 |                                                                   |                  |
|                     | Coniferous +broadleaf             | 20                    | 0.19ns                          | 0.21***                         | -                                                                 | -                |
|                     | Coniferous                        | 6                     | 0.11ns                          | 0.22ns                          | -                                                                 | -                |
|                     | Broadleaf                         | 14                    | 0.58***                         | 0.10***                         | 5.80                                                              | ***              |
|                     | AM&EM                             | 13                    | 0.33**                          | 0.13**                          | 2.54                                                              | **               |
|                     | OM                                | 28                    | 0.41***                         | 0.08***                         | 5.13                                                              | ***              |
| Different treatment | Control +CO <sub>2</sub> increase | 17                    | 0.27***                         | 0.18***                         | 1.50                                                              | **               |
|                     | Control                           | 17                    | 0.26***                         | 0.18***                         | 1.44                                                              | -                |

|    |                          |    |         |         |      |     |
|----|--------------------------|----|---------|---------|------|-----|
| ts | CO <sub>2</sub> increase | 17 | 0.28*** | 0.18*** | 1.56 | *   |
|    | Control + N increase     | 14 | 0.46*** | 0.11*** | 4.18 | *** |
|    | Control                  | 14 | 0.52*   | 0.09ns  | -    | -   |
|    | N increase               | 14 | 0.43*** | 0.11*** | 3.91 | *** |
|    | Control + P increase     | 14 | 0.53*** | 0.08**  | 6.63 | *** |
|    | Control                  | 14 | 0.52*** | 0.09ns  | -    | -   |
|    | P increase               | 14 | 0.54*** | 0.07ns  | -    | -   |
|    | Dry + rainy season       | 8  | 0.25*** | 0.20*** | 1.25 | -   |
|    | Dry season               | 8  | 0.42*** | 0.12*   | 3.50 | *   |
|    | Rainy season             | 8  | 0.24*** | 0.21*   | 1.14 | -   |

457 \*\*\*, \*\* and \* indicate significant levels at  $p < 0.001$ ,  $p < 0.01$ , and  $p < 0.05$ , and ns indicates no significance ( $p > 0.05$ ).  
 458 The  $Slope_{(RD-CT)} / Slope_{(RD-SR)}$  and the Slope comparison are denoted by “-” when either of the above slopes is statistically different.

459  
 460

461 **Table 2.** The allometric relationships between root diameter (RD) and the cortex thickness (CT) and the stele radius (SR) in each of the 26 studies with more than 3  
 462 plant species examined. See supplementary data 1 for the details of these studies. *Slope* <sub>(RD-CT)</sub>: the slope for the regression of the cortex thickness with root diameter;  
 463 *Slope* <sub>(RD-SR)</sub>: the slope for the regression of the stele radius with root diameter; *Slope* <sub>(RD-CT)</sub>/*Slope* <sub>(RD-SR)</sub>: ratio of the *Slope* <sub>(RD-CT)</sub> to the *Slope* <sub>(RD-SR)</sub>; Slope  
 464 comparison: the statistical test of the difference between the above two slopes using standardized major axis method.

| Study | The number of species | <i>Slope</i> <sub>(RD-CT)</sub> | <i>Slope</i> <sub>(RD-SR)</sub> | <i>Slope</i> <sub>(RD-CT)</sub> / <i>Slope</i> <sub>(RD-SR)</sub> | Slope comparison |
|-------|-----------------------|---------------------------------|---------------------------------|-------------------------------------------------------------------|------------------|
| 1     | 19                    | 0.27***                         | 0.23***                         | 1.17                                                              | -                |
| 2     | 14                    | 0.37***                         | 0.13*                           | 2.85                                                              | *                |
| 3     | 20                    | 0.39***                         | 0.12***                         | 3.25                                                              | ***              |
| 4     | 23                    | 0.37***                         | 0.14***                         | 2.64                                                              | **               |
| 5     | 27                    | 0.40***                         | 0.10***                         | 4.00                                                              | ***              |
| 6     | 5                     | 0.39**                          | 0.07*                           | 5.57                                                              | **               |
| 7     | 96                    | 0.75***                         | 0.10***                         | 7.50                                                              | ***              |
| 8     | 9                     | 0.47***                         | 0.03ns                          | -                                                                 | -                |
| 9     | 12                    | 0.39***                         | 0.11***                         | 3.55                                                              | ***              |
| 10    | 7                     | 0.32***                         | 0.08**                          | 4.00                                                              | **               |
| 11    | 34                    | 0.47***                         | 0.03***                         | 15.67                                                             | ***              |
| 12    | 6                     | 0.40***                         | 0.13*                           | 3.08                                                              | **               |
| 13    | 12                    | 0.06ns                          | 0.25***                         | -                                                                 | -                |
| 14    | 15                    | 0.70***                         | 0.004ns                         | -                                                                 | -                |
| 15    | 16                    | 0.89***                         | 0.08*                           | 11.13                                                             | ***              |
| 16    | 91                    | 0.35***                         | 0.11***                         | 3.18                                                              | ***              |
| 17    | 34                    | 0.27***                         | 0.18***                         | 1.50                                                              | **               |
| 18    | 3                     | 0.52ns                          | 0.14ns                          | -                                                                 | -                |
| 19    | 18                    | 0.37***                         | 0.13***                         | 2.85                                                              | ***              |
| 20    | 42                    | 0.48***                         | 0.10***                         | 4.80                                                              | ***              |
| 21    | 32                    | 0.39***                         | 0.04***                         | 9.75                                                              | ***              |

|    |    |         |         |      |     |
|----|----|---------|---------|------|-----|
| 22 | 8  | 0.09ns  | 0.05ns  | -    | -   |
| 23 | 26 | 0.33*** | 0.15*** | 2.20 | **  |
| 24 | 16 | 0.25*** | 0.20*** | 1.25 | -   |
| 25 | 10 | 0.39*** | 0.11*** | 3.55 | *** |
| 26 | 17 | 0.42*** | 0.08*** | 5.25 | *** |

465 \*\*\*, \*\* and \* indicate significant levels at  $p < 0.001$ ,  $p < 0.01$ , and  $p < 0.05$ , and ns indicates no significance ( $p > 0.05$ ). The  $Slope_{(RD-CT)} / Slope_{(RD-SR)}$  and the Slope  
466 comparison are denoted by “-” when either of the above slopes is statistically different.

467

468

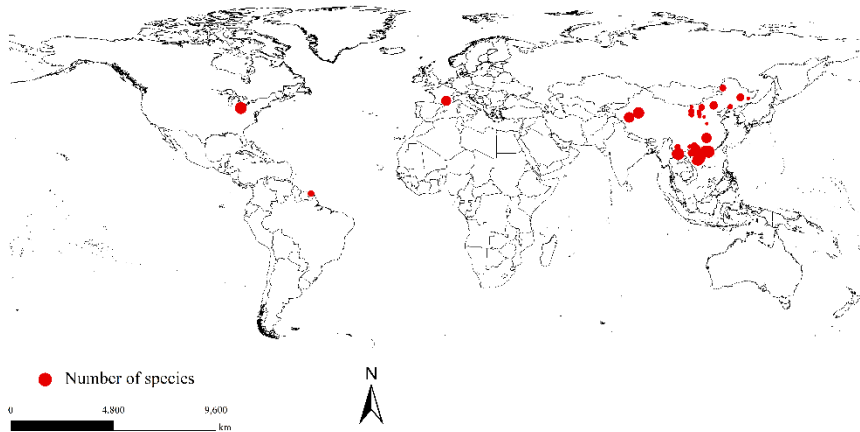

469

470 **Fig. 1** A global map of 32 studies reporting data of the cortex and the stele in absorptive roots.

471 Each study is represented by a red circle, and the size of the circle is proportional to the species

472 number included in the studies.

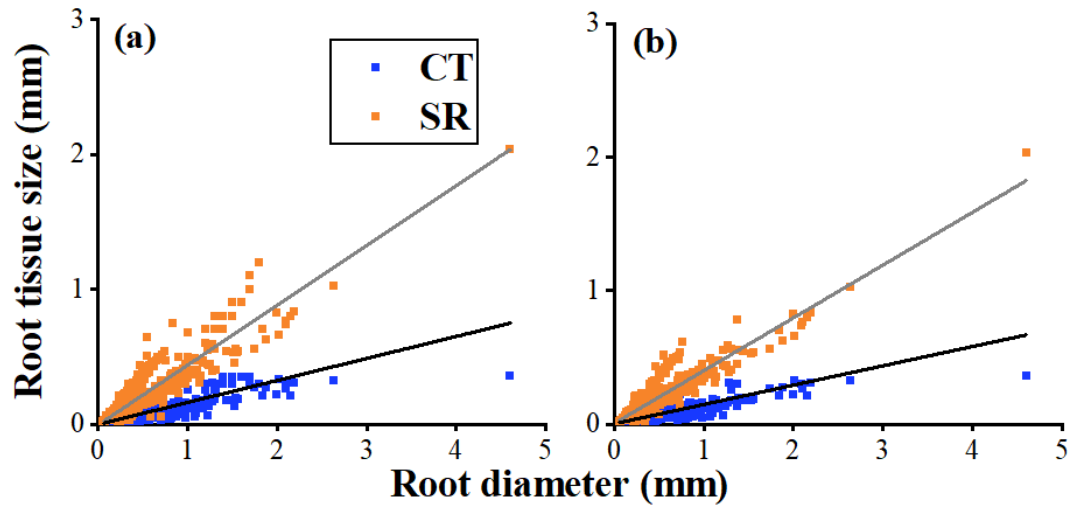

473

474 **Fig. 2** The Allometric relationship between the root cortex and the stele across 698 observation (a)

475 and 512 species (b), CT: cortex thickness; SR: stele radius.



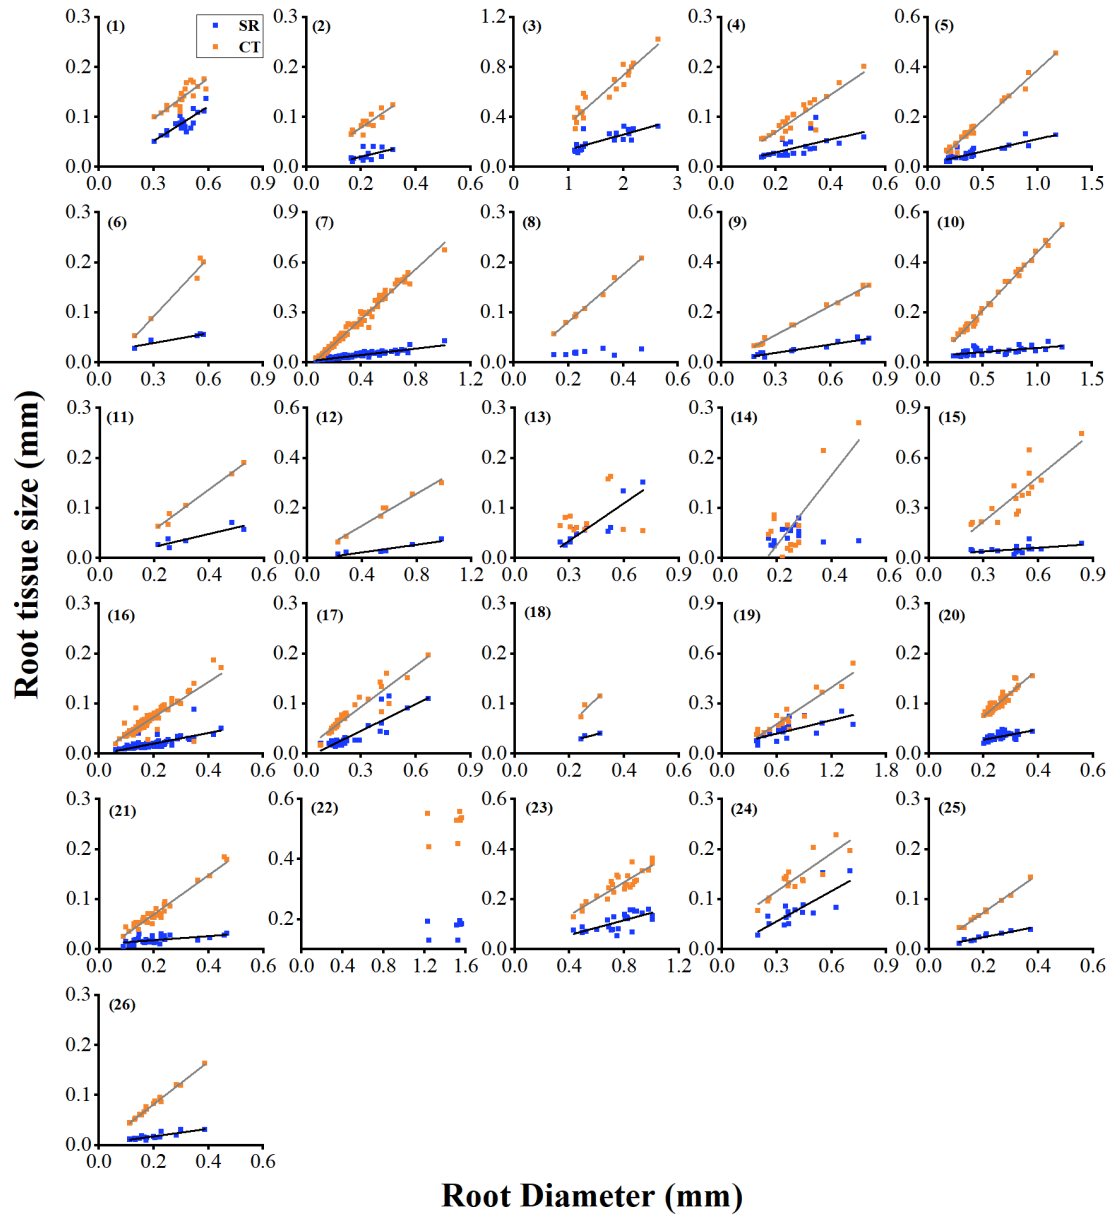

476

477 **Fig. 3** The Allometric relationship between the root cortex and the stele in 26 studies with more  
478 than three plant species examined. See supplementary data 1 and 2 for detailed information of these  
479 studies. CT: cortex thickness; SR: stele radius.

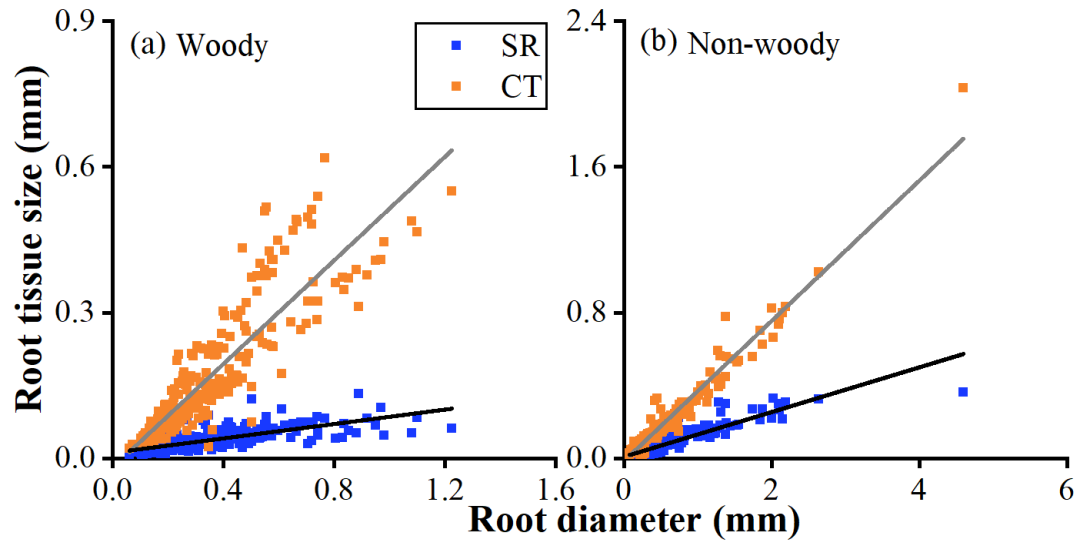

480

481 **Fig. 4** The Allometric relationship between the root cortex and the stele in woody (a) and non-  
482 woody (b) species. CT: cortex thickness; SR: stele radius.

483

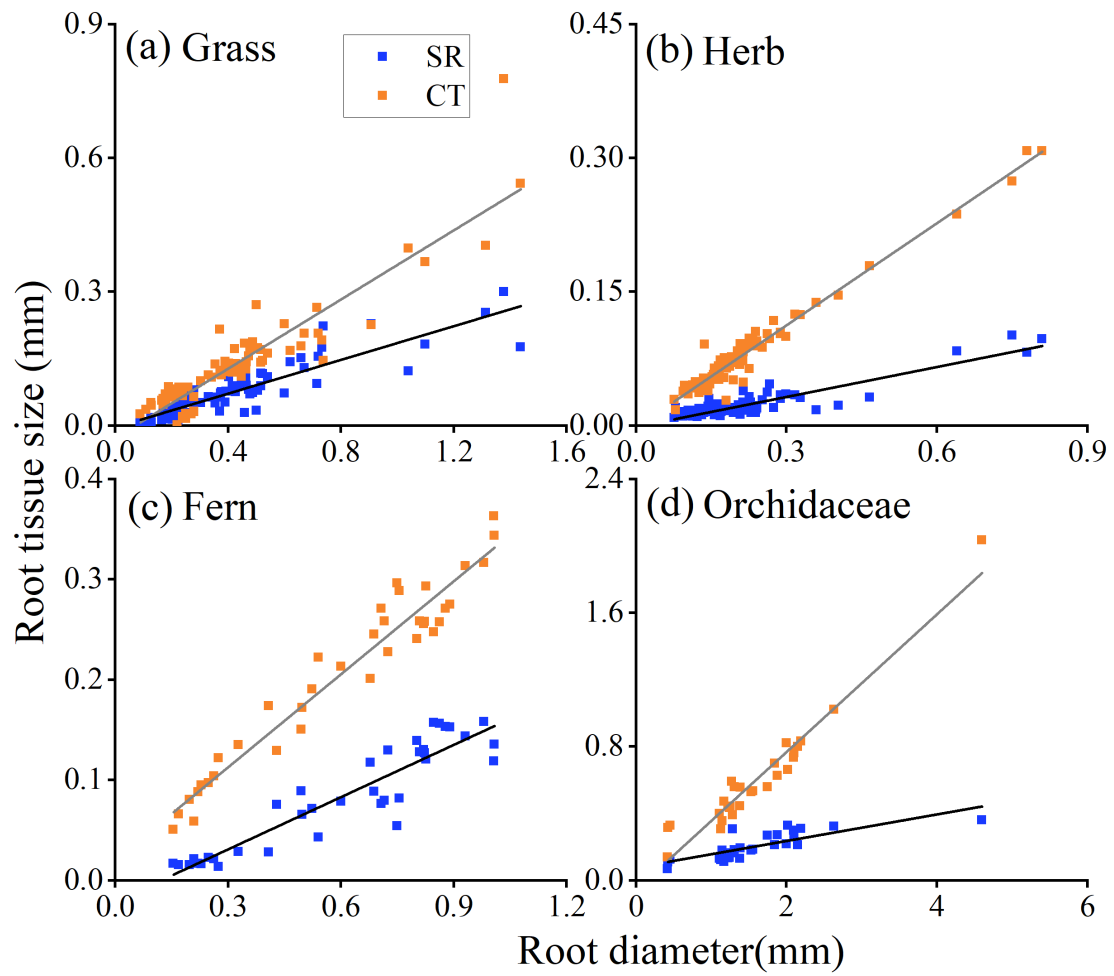

484

485 **Fig. 5** The allometric relationship between the root cortex and stele in grass (a), herb (b), fern (c)  
486 and Orchidaceae (d). CT: cortex thickness, SR: stele radius.

487

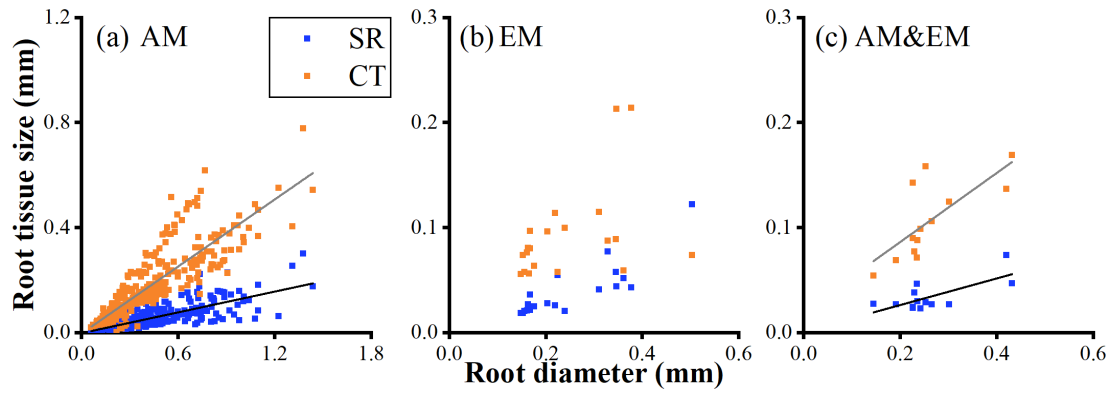

488

489 **Fig. 6** The allometric relationship between the root cortex and the stele in different mycorrhizal  
490 plants. AM: Mycorrhizae (a); EM: Ectomycorrhizae (b); AM&EM: dual mycorrhizas of AM  
491 and EM (c); CT: cortex thickness, SR: stele radius.

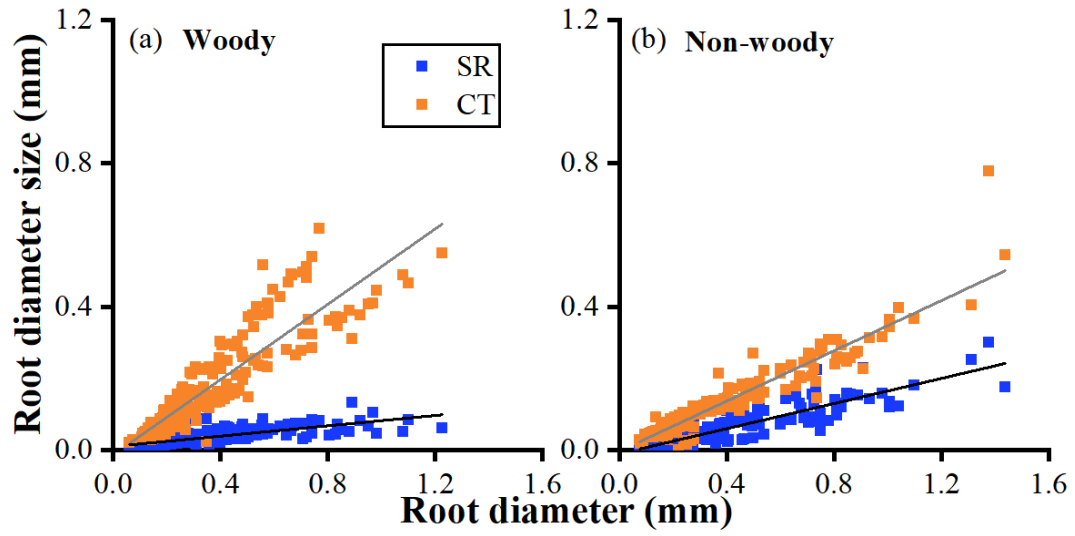

492

493 **Fig. 7** The allometric relationship between the root cortex and the stele in woody AM plants (a)  
494 and non-woody AM plants (b). CT: cortex thickness, SR: stele radius.

495

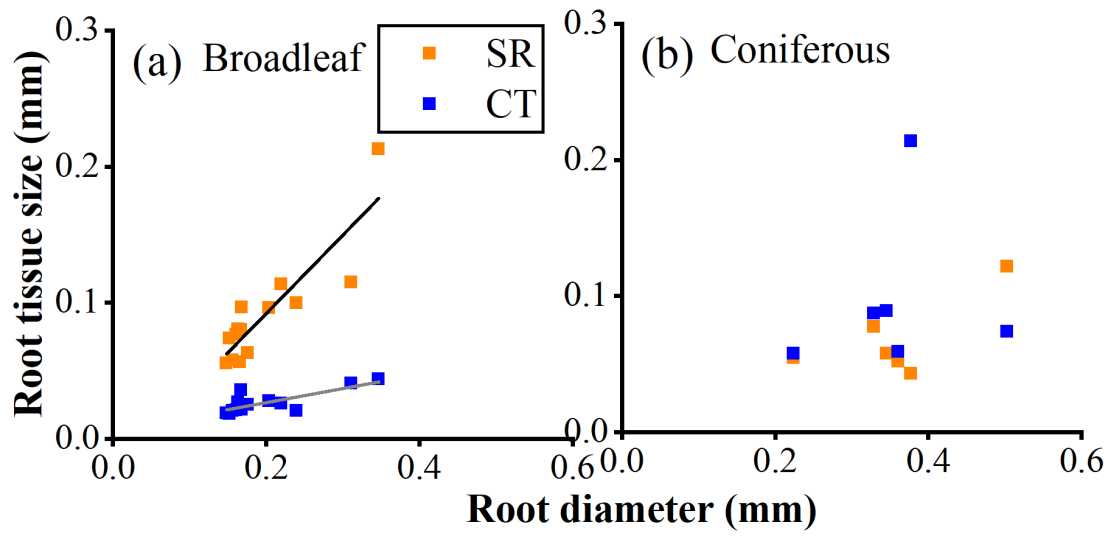

496

497

498

**Fig. 8** The allometric relationship between the root cortex and the stele in broadleaf EM plants (a) and coniferous EM plants (b). CT: cortex thickness, SR: stele radius.

499

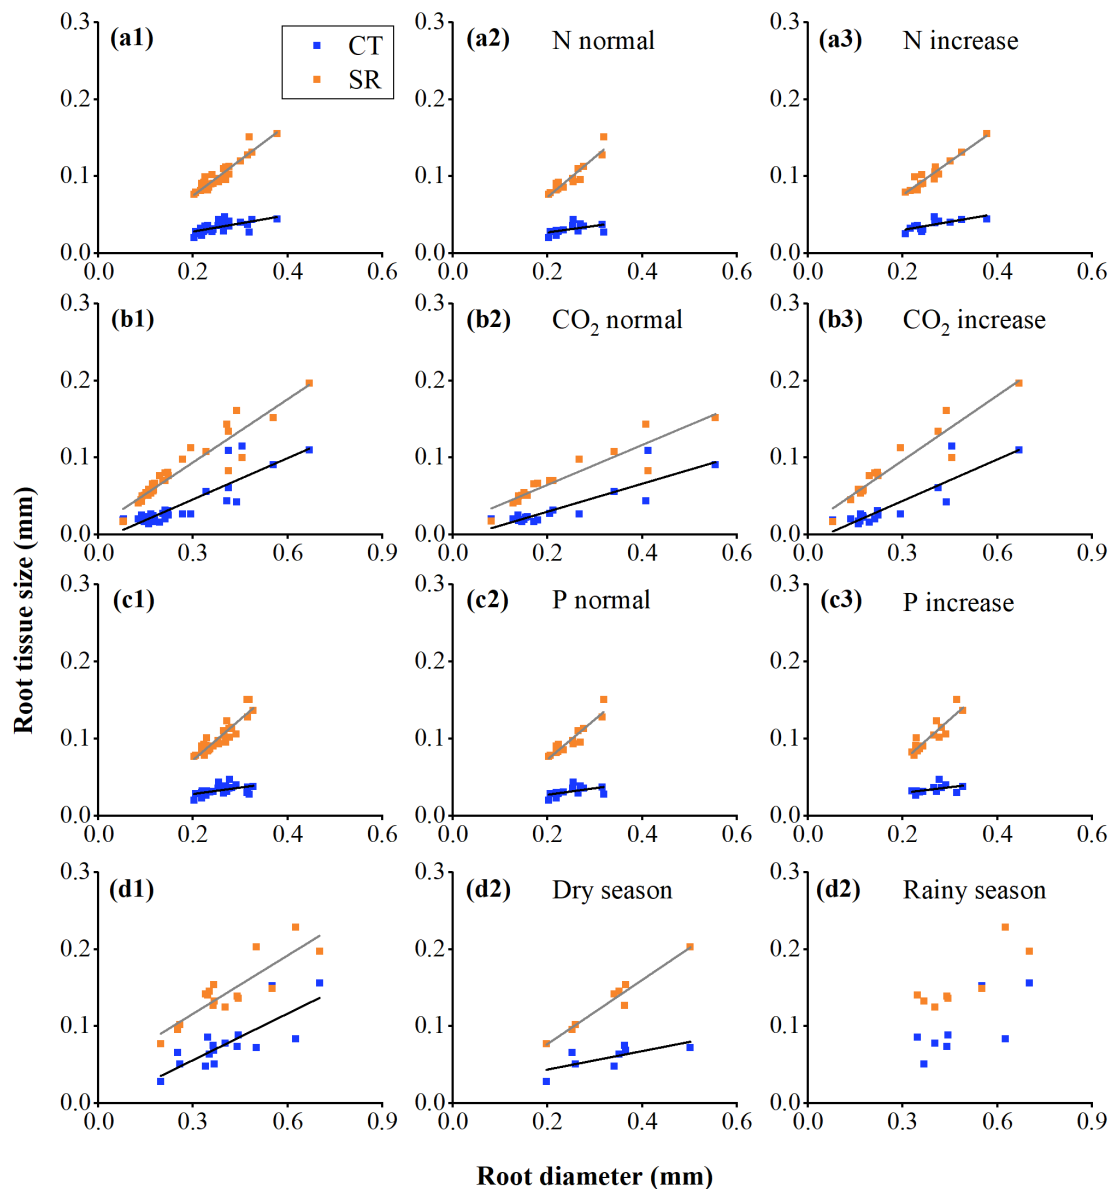

500

501 **Fig. 9** The allometric relationship between the root cortex and the stele under different  
502 environmental treatments. Nitrogen (N) deposition: control + N deposition (a<sub>1</sub>), control (a<sub>2</sub>) and N  
503 increase (a<sub>3</sub>); elevation of atmospheric CO<sub>2</sub> concentration: control + CO<sub>2</sub> increase (b<sub>1</sub>), control  
504 (b<sub>2</sub>), CO<sub>2</sub> increase (b<sub>3</sub>); phosphorus (P) fertilization: control + P increase (c<sub>1</sub>), control  
505 (c<sub>1</sub>), P increase (c<sub>1</sub>); seasonality: dry season + rain season (d<sub>1</sub>), dry season (d<sub>2</sub>), rain season (d<sub>3</sub>). CT:  
506 cortex thickness, SR: stele radius.

507

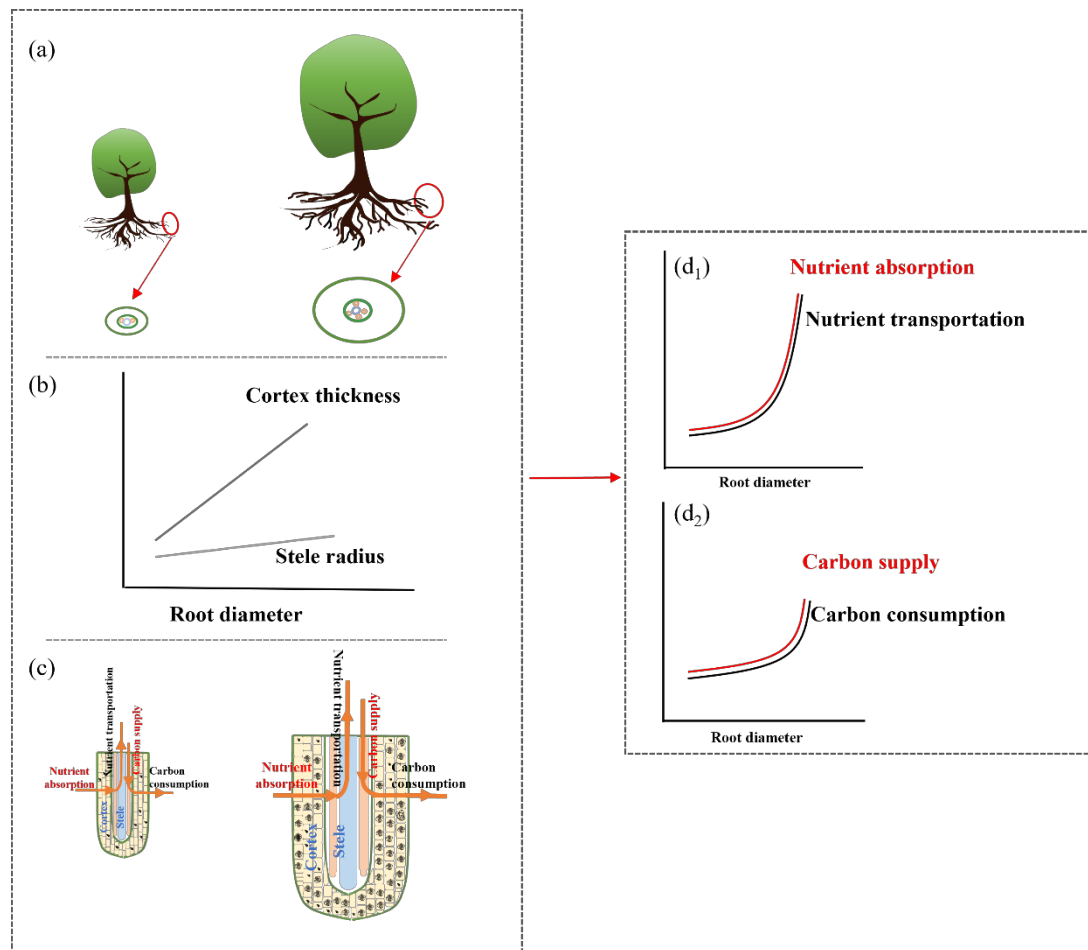

508

509 **Fig. 10** Mechanisms for the allometric relationship between the cortex and the stele in  
510 absorptive roots. For simplicity, we presented two plant species with a thin and a thick  
511 absorptive root, respectively, followed by the cross-sectional area of the roots (a). The  
512 cortex section is indicated by the area between the two green circles; the inner green  
513 circle, the stele; blue circles, the vessels; orange circles, the sieves. Different functions  
514 of the root anatomical structures are shown in the longitudinal section model of the  
515 roots (b) The change in the size of the cortex and stele with the shift of root diameter  
516 across species is shown in (c): cortex, sites for the symbiosis with mycorrhizal fungi  
517 (i.e., the intermingled lines in the cortical cells) and carbon consumption; vessels,  
518 transport for the water and nutrients; sieves, transport for carbohydrates. The  
519 allometric relationship between the root cortex and stele is considered to meet the  
520 balance between nutrient absorption (via mycorrhizal fungi in the cortex) and nutrient  
521 transportation (via the stele) (d<sub>1</sub>) and between carbon supply (via the stele) and carbon  
522 consumption (via the cortex) (d<sub>2</sub>). The conceptual models in (d<sub>1</sub>) and (d<sub>2</sub>) are redrawn  
523 from Kong et al. (2017) and Kong et al. (2021).



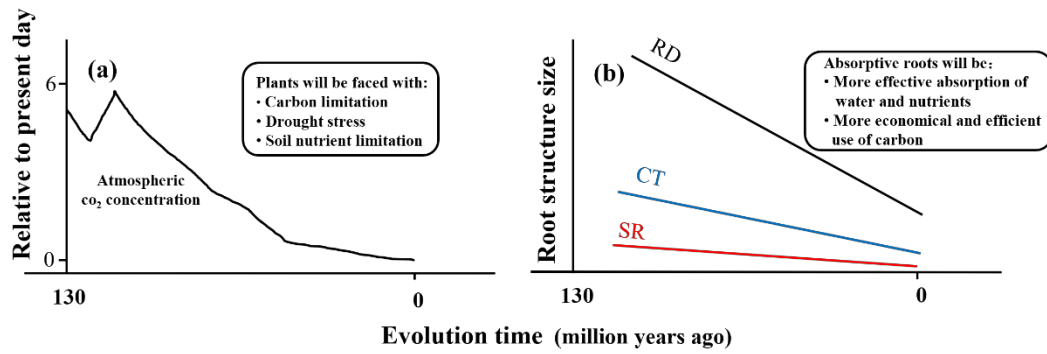

524

525

526

527

528

529

**Fig. 11** The co-variation of atmospheric CO<sub>2</sub> concentration (a) and anatomical structures in absorptive roots (b) since the Cretaceous. The pattern for the change of atmospheric CO<sub>2</sub> concentration is redrawn from the study by Beerling et al. (2010). The resulting environmental changes and the adaptive responses of the roots are presented as insets in this figure. RD: absorptive root diameter; CT: cortex thickness, SR: stele radius.
